# Supplementary material
Source: publisher figshare collection journal article supplement (https://acs.figshare.com/ndownloader/files/21936528)
Supplement: Supplementary file 1 [file 21936528]

---

## Supporting Information

### Reprocessable epoxy resins based on hydroxy-thioester and thiol-thioester dual exchanges

Yumin Yang<sup>a b</sup>, Qingfei Song<sup>a b</sup>, Chunmei Li<sup>\*a b</sup>, Jiaojun Tan<sup>a c</sup>, Ying Xue<sup>a b</sup>,

Zhengzhou Su<sup>a b</sup>, Guoxian Zhang<sup>a b</sup>, Qiuyu Zhang<sup>\*a b</sup>

<sup>a</sup>Key Laboratory of Special Functional and Smart Polymer Materials of Ministry of Industry and Information Technology, School of Chemistry and Chemical Engineering, Northwestern Polytechnical University, Xi'an, China

<sup>b</sup>Research & Development Institute of Northwestern Polytechnical University in Shenzhen, Shenzhen, 518057, China

<sup>c</sup>College of Bioresources Chemical and Materials Engineering, Shaanxi University of Science and Technology, Xi'an, China;

\*Corresponding author.

Email: lichunmei@nwpu.edu.cn (C. Li); qyzhang@nwpu.edu.cn (Q. Zhang).

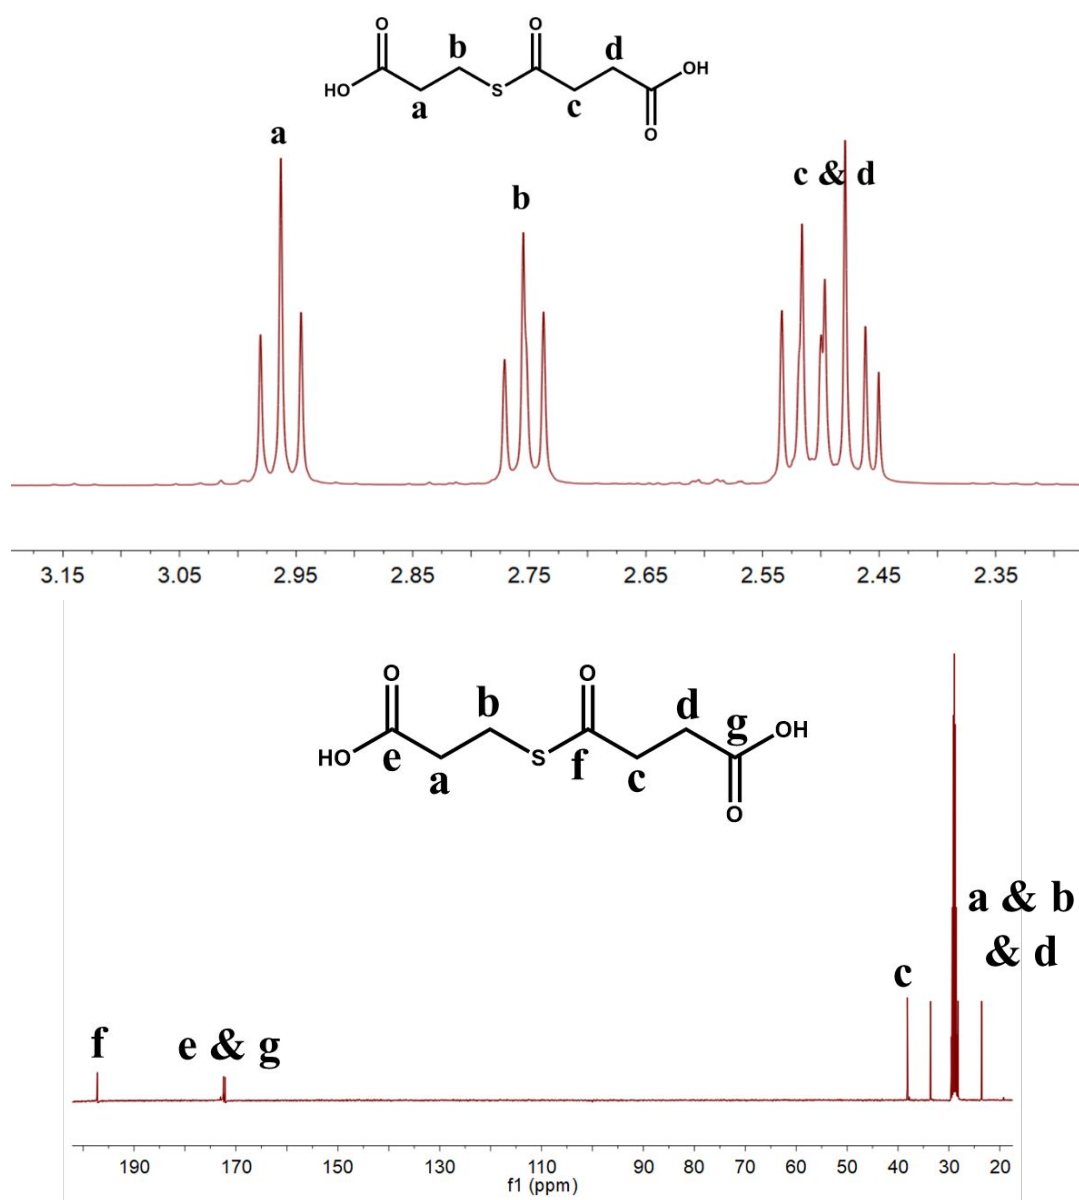

**Figure S1** NMR spectrum of CTOA. Top:  $^1\text{H}$  NMR. Bottom:  $^{13}\text{C}$  NMR

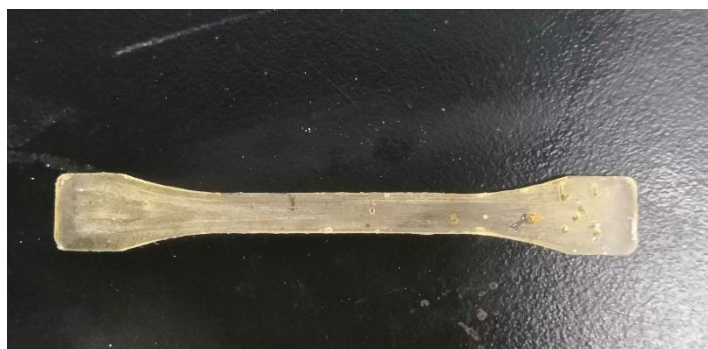

**Figure S2** EER is degraded by thiol and continues to be used for epoxy E51 curing.

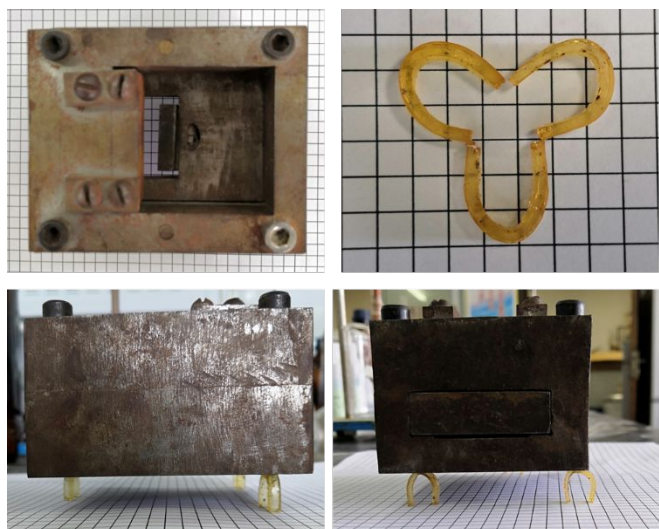

**Figure S3** Test of supporting weights after shape memory. (a, c, d) three views of the load bearing material; (b) epoxy resin for support. (Epoxy resin weighs 0.7644g, weight iron block weighs 1845.5g).
